# Supplementary material for: Sex-Specific Models to Predict Insulin Secretion and Sensitivity in Subjects with Overweight and Obesity
Source: MDPI journal article supplement (doi:10.3390/ijms24076130), 2023-03-24
Supplement: s1 [file s1]

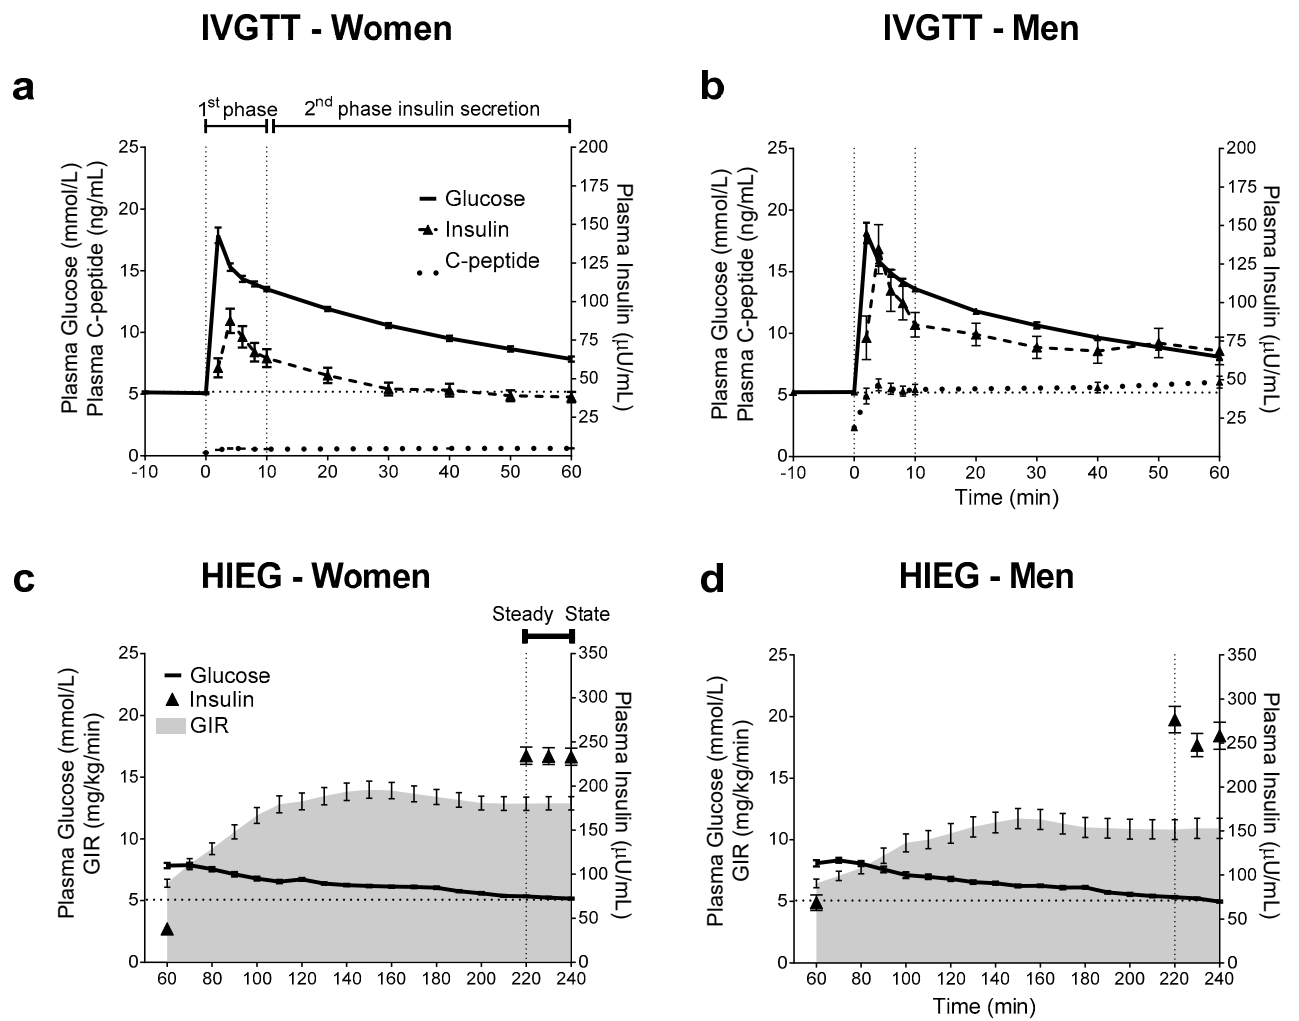

**Supplemental Figure 1:** Plasma glucose, insulin, and C-peptide concentrations, and glucose infusion rates (GIR) during the IVGTT in women (a) and men (b) and the hyperinsulinemic euglycemic clamp in women (c) and men (d), which as the 2 component tests of the Botnia clamps conducted in non-diabetic postmenopausal women (N = 61) and age-matched men (N = 37) with overweight and obesity.

**Supplemental Table 1:** Sex-specific models to predict 1st phase, 2nd phase and total GIISIVGTT, glucose-induced C-peptide secretionIVGTT and insulin sensitivity (GIRclamp) measured during the Botnia-clamps in 98 middle-aged men and postmenopausal women with overweight and obesity, but no chronic disease or medication affecting metabolism.

| <b>Women</b>                                   |                                                                                                                                |
|------------------------------------------------|--------------------------------------------------------------------------------------------------------------------------------|
| 1 <sup>st</sup> phase GIISIVGTT                | = 178 + (Log <sub>10</sub> Insulin × 1409) – (Glucose * 303) + (ApoB * 438)                                                    |
| 2 <sup>nd</sup> phase GIISIVGTT                | = – 5458 + (Log <sub>10</sub> Insulin * 5683) + (ApoB * 1298)                                                                  |
| Total GIISIVGTT                                | = – 6240 + (Log <sub>10</sub> Insulin * 7283) + (ApoB * 2632) – (Glucose * 894) + (Waist * 31) – (Log <sub>10</sub> TG * 1963) |
| 1 <sup>st</sup> phase C-peptide secretionIVGTT | = 76 + (C-peptide * 18.3) – (Glucose * 13.9)                                                                                   |
| Total C-peptide secretionIVGTT                 | = 319 + (C-peptide * 129) – (Glucose * 58.1)                                                                                   |
| Insulin sensitivity (GIRclamp)                 | = 30.9 – (Log <sub>10</sub> Insulin * 8.37) – (Waist * 0.130) + (HDL-C * 3.03)                                                 |
| <b>Men</b>                                     |                                                                                                                                |
| 1 <sup>st</sup> phase GIISIVGTT                | = 1369 + (Log <sub>10</sub> Insulin * 1863) – (Glucose * 539)                                                                  |
| 2 <sup>nd</sup> phase GIISIVGTT                | = – 5934 + (Log <sub>10</sub> Insulin * 7850) – (Glucose * 1137) + (BMI * 104) + (TC * 413)                                    |
| Total GIISIVGTT                                | = – 4859 + (Log <sub>10</sub> Insulin * 9652) – (Glucose * 1680) + (BMI * 108) + (TC * 466)                                    |
| 1 <sup>st</sup> phase C-peptide secretionIVGTT | = 11.6 + (C-peptide * 17.0)                                                                                                    |
| Total C-peptide secretionIVGTT                 | = 75.6 + (C-peptide * 111)                                                                                                     |
| Insulin sensitivity (GIRclamp)                 | = 55.9 – (Log <sub>10</sub> Insulin * 8.43) – (Waist * 0.134) – (Glucose * 3.63)                                               |
